# Supplementary material for: Formation of an Intracontinental Orogen Above the Permo-Triassic Mantle Convection Cell in the Paleo-Tethys Tectonic Realm due to Far-Field Stress Derived From Continental Margins
Source: Frontiers journal article supplement (doi:10.3389/feart.2022.892787), 2022-05-10
Supplement: Table_5.XLS [file Table_5.XLS]

## Sheet: Sheet1
Lu-Hf isotope compositions of zircons analyzed
Sample No.	t (Ma)	176Yb/177Hf	176Lu/177Hf	176Hf/177Hf	176Hf/177Hf(c)	2 σm	176Hf/177Hfi	176Hf/177Hfi(DM)	ƐHf(0)	ƐHf(t)	2 σ	TDM1(Hf)	TDMC	fLu/Hf
WY1215-0	245.43	0.000175974	4.52975e-06	0.282491	0.282489	2.05748e-05	0.282489	0.283074	-10.0229	-4.63392	0.728003	1051.79	1568.19	-0.999864
WY1215-01	247.268	0.000456128	1.32426e-05	0.282506	0.282504	2.00239e-05	0.282503	0.283072	-9.49314	-4.06481	0.708515	1031.53	1533.7	-0.999601
WY1215-02	248.514	0.000405206	1.33294e-05	0.282514	0.282512	2.37373e-05	0.282512	0.283071	-9.19651	-3.7406	0.83991	1020.05	1514.19	-0.999599
WY1215-03	249.596	0.000365922	1.02119e-05	0.282513	0.282511	2.22689e-05	0.282511	0.283071	-9.21827	-3.73802	0.787955	1020.81	1514.88	-0.999692
WY1215-04	246.835	0.000356355	9.60815e-06	0.282504	0.282502	2.01098e-05	0.282502	0.283073	-9.53916	-4.1198	0.711552	1033.21	1536.83	-0.999711
WY1215-05	247.793	0.000393776	1.11978e-05	0.282483	0.282481	2.27995e-05	0.282481	0.283072	-10.2961	-4.85628	0.806726	1062.54	1584.07	-0.999663
WY1215-06	247.844	0.000389389	1.23482e-05	0.282502	0.2825	2.08298e-05	0.2825	0.283072	-9.60437	-4.16327	0.737031	1035.81	1540.37	-0.999628
WY1215-07	247.913	0.000179978	5.04351e-06	0.282496	0.282494	2.02516e-05	0.282493	0.283072	-9.84849	-4.40479	0.716571	1045.06	1555.67	-0.999848
WY1215-08	230.25	0.000239439	7.99032e-06	0.282464	0.282462	2.26609e-05	0.282462	0.283085	-10.9547	-5.90095	0.801789	1087.92	1636.23	-0.999759
WY1215-09	252.381	0.00031918	9.01032e-06	0.282493	0.282491	2.01592e-05	0.282491	0.283069	-9.9285	-4.38712	0.713309	1048.26	1558.05	-0.999729
WY1215-10	243.558	0.000259197	6.68991e-06	0.282499	0.282497	1.97318e-05	0.282497	0.283075	-9.74052	-4.39293	0.698172	1040.92	1551.52	-0.999798
WY1215-11	247.839	0.000263016	7.09962e-06	0.282501	0.282499	2.02927e-05	0.282499	0.283072	-9.65136	-4.20952	0.718027	1037.48	1543.29	-0.999786
WY1215-12	249.125	0.000391466	1.30529e-05	0.282481	0.282479	2.24338e-05	0.282479	0.283071	-10.3647	-4.89594	0.793786	1065.24	1587.62	-0.999607
WY1215-13	252.079	0.000224552	7.21051e-06	0.282507	0.282505	2.42663e-05	0.282505	0.283069	-9.44446	-3.90916	0.858632	1029.48	1527.63	-0.999783
WY1215-14	248.415	0.000453347	1.56949e-05	0.282516	0.282514	2.11124e-05	0.282514	0.283071	-9.13793	-3.68455	0.74703	1017.84	1510.58	-0.999527
WY1215-15	250.901	0.000442431	1.39213e-05	0.282504	0.282502	2.45399e-05	0.282501	0.28307	-9.56456	-4.05638	0.868314	1034.31	1536.01	-0.999581
WY1215-16	256.357	0.00055841	2.08813e-05	0.282519	0.282517	2.2015e-05	0.282517	0.283066	-9.01746	-3.39002	0.77898	1013.31	1498.17	-0.999371
WY1215-17	247.932	0.000193451	5.63279e-06	0.28248	0.282478	2.13256e-05	0.282478	0.283072	-10.4106	-4.96693	0.754573	1066.81	1591.16	-0.99983
WY1215-18	249.688	0.000272446	6.87295e-06	0.282474	0.282472	1.92743e-05	0.282472	0.283071	-10.6183	-5.13621	0.681994	1074.88	1603.21	-0.999793
WY1215-19	234.439	0.000578252	2.24215e-05	0.282519	0.282517	2.22471e-05	0.282517	0.283082	-9.01264	-3.86788	0.787156	1013.17	1511.24	-0.999325
WY1215-20	250.166	0.00050485	1.40463e-05	0.282503	0.282501	2.06648e-05	0.282501	0.28307	-9.57698	-4.085	0.731195	1034.79	1537.24	-0.999577
WY1215-21	236.035	0.000222866	6.17724e-06	0.28251	0.282508	2.42326e-05	0.282508	0.28308	-9.33805	-4.1558	0.857412	1025.34	1530.67	-0.999814
WY1215-22	245.608	0.000252966	7.44233e-06	0.282509	0.282507	2.27422e-05	0.282507	0.283074	-9.3709	-3.9781	0.804692	1026.64	1526.93	-0.999776
WY1215-23	251.141	0.000433206	1.2204e-05	0.282467	0.282465	2.05498e-05	0.282465	0.28307	-10.8613	-5.34829	0.727127	1084.42	1617.73	-0.999632
WY1215-24	250.918	0.000260175	6.83819e-06	0.282479	0.282477	2.38383e-05	0.282477	0.28307	-10.4165	-4.90722	0.843486	1067.07	1589.73	-0.999794
WY1215-25	247.882	0.000119209	3.31345e-06	0.282521	0.282519	2.1642e-05	0.282519	0.283072	-8.96192	-3.51815	0.765767	1010.7	1499.65	-0.9999
WY1216-01	242.119	0.000622574	1.93341e-05	0.28275	0.282748	1.7519e-05	0.282748	0.283076	-0.840231	4.47839	0.619875	695.689	987.399	-0.999418
WY1216-02	239.753	0.000932903	3.58011e-05	0.282744	0.282742	1.72602e-05	0.282742	0.283078	-1.05745	4.20632	0.610716	704.45	1002.91	-0.998922
WY1216-03	249.042	0.000344394	9.17047e-06	0.282607	0.282605	1.86024e-05	0.282605	0.283071	-5.89391	-0.423868	0.658217	891.949	1304.65	-0.999724
WY1216-04	256.341	0.000580114	1.66192e-05	0.282744	0.282742	1.9229e-05	0.282742	0.283066	-1.0553	4.577	0.680401	704.016	992.207	-0.999499
WY1216-05	238.981	0.000743304	2.08269e-05	0.282777	0.282775	1.78805e-05	0.282775	0.283078	0.10352	5.35327	0.632662	658.94	929.105	-0.999373
WY1216-06	245.694	0.000343098	9.38486e-06	0.282783	0.282781	1.91167e-05	0.28278	0.283073	0.301138	5.70075	0.67641	651.043	912.148	-0.999717
WY1216-07	241.713	0.000397611	1.0933e-05	0.282801	0.282799	1.54453e-05	0.282799	0.283076	0.97015	6.28212	0.546502	624.987	871.884	-0.999671
WY1216-08	247.429	0.000308891	8.87239e-06	0.282719	0.282717	1.90642e-05	0.282717	0.283072	-1.95327	3.48344	0.674556	738.828	1054.98	-0.999733
WY1216-09	264.82	0.00071695	2.24857e-05	0.282646	0.282644	2.14334e-05	0.282643	0.28306	-4.54364	1.27247	0.758416	839.822	1209.26	-0.999323
WY1216-10	247.351	0.000391896	1.06312e-05	0.282753	0.282751	1.85377e-05	0.282751	0.283072	-0.733689	4.70168	0.655926	691.383	977.235	-0.99968
WY1216-11	249.153	0.000507877	1.35511e-05	0.282806	0.282804	1.51827e-05	0.282804	0.283071	1.13021	6.60583	0.537216	618.787	856.99	-0.999592
WY1216-12	250.294	0.000786268	2.24317e-05	0.282783	0.282781	1.6942e-05	0.282781	0.28307	0.314389	5.81323	0.599471	650.747	908.551	-0.999324
WY1216-13	245.051	0.000487317	1.27264e-05	0.282796	0.282793	1.70636e-05	0.282793	0.283074	0.760242	6.14537	0.603766	633.202	883.231	-0.999617
WY1216-14	244.73	0.000426296	1.29748e-05	0.282796	0.282794	1.68866e-05	0.282794	0.283074	0.789878	6.16792	0.597501	632.05	881.54	-0.999609
WY1216-15	251.416	0.000575472	1.71827e-05	0.282614	0.282612	1.97848e-05	0.282612	0.283069	-5.66937	-0.14825	0.700058	883.419	1289.02	-0.999482
WY1216-16	266.959	0.000291011	8.42549e-06	0.282794	0.282792	1.70496e-05	0.282792	0.283058	0.715305	6.58409	0.6033	634.883	872.271	-0.999746
WY1216-17	248.893	0.000573761	1.8142e-05	0.282791	0.282789	1.93636e-05	0.282789	0.283071	0.603922	6.07275	0.685154	639.386	890.871	-0.999454
WY1216-18	1762.37	0.0111395	0.000424426	0.281223	0.281221	1.56806e-05	0.281207	0.281965	-54.8329	-16.124	0.556719	2787.29	3470.36	-0.987216
WY1216-19	248.102	0.000533127	1.41446e-05	0.282794	0.282792	1.7849e-05	0.282792	0.283072	0.692454	6.14455	0.631559	635.868	885.664	-0.999574
WY1216-20	249.323	0.000515314	1.33281e-05	0.282744	0.282742	1.77183e-05	0.282742	0.283071	-1.06128	4.41691	0.626937	704.189	996.943	-0.999599
WY1216-21	249.641	0.000710467	2.34407e-05	0.282645	0.282643	1.7121e-05	0.282643	0.283071	-4.56416	0.917453	0.605801	840.64	1219.97	-0.999294
WY1216-22	239.606	0.000350189	1.09024e-05	0.282771	0.282769	1.82318e-05	0.282769	0.283078	-0.113207	5.15177	0.645092	667.216	942.46	-0.999672
WY1216-23	248.063	0.000698762	2.09329e-05	0.282798	0.282796	1.90364e-05	0.282796	0.283072	0.843358	6.29357	0.673574	630.095	876.107	-0.999369
WY1216-24	252.891	0.00056342	1.44557e-05	0.282727	0.282725	2.18542e-05	0.282724	0.283068	-1.67903	3.87725	0.773285	728.261	1034.14	-0.999565
WY1216-25	248.396	0.000427641	1.22454e-05	0.28273	0.282728	1.73791e-05	0.282728	0.283072	-1.56549	3.89218	0.614933	723.8	1029.68	-0.999631
WY1216-26	245.658	0.000991154	2.55305e-05	0.282666	0.282664	1.76217e-05	0.282664	0.283073	-3.81235	1.58162	0.623512	811.467	1174.65	-0.999231
WY1216-27	260.779	0.000543039	1.72238e-05	0.28277	0.282768	1.74529e-05	0.282768	0.283063	-0.144108	5.5864	0.617563	668.53	931.224	-0.999481
WY1216-28	262.536	0.000407512	1.03547e-05	0.282656	0.282654	1.79498e-05	0.282654	0.283061	-4.1767	1.59141	0.635147	825.305	1187.21	-0.999688
WY1216-30	248.352	0.000280409	7.4707e-06	0.282725	0.282723	1.65316e-05	0.282723	0.283072	-1.72859	3.7288	0.584946	730.058	1040.06	-0.999775
WY11-01	246.852	0.00116171	4.82556e-05	0.282422	0.28242	1.97757e-05	0.282419	0.283073	-12.4581	-7.04629	0.699732	1147.19	1721.34	-0.998547
WY11-02	488.235	0.0258419	0.000922435	0.282223	0.282221	1.96299e-05	0.282212	0.282898	-19.5005	-9.05778	0.694944	1451.37	2036.42	-0.972216
WY11-03	251.234	0.0157794	0.000675465	0.282282	0.28228	2.16814e-05	0.282277	0.283069	-17.3883	-11.9872	0.76717	1359.39	2034.82	-0.979655
WY11-04	271.501	0.0139829	0.000603012	0.28198	0.281978	3.2549e-05	0.281975	0.283055	-28.0687	-22.2238	1.15176	1772.47	2687.42	-0.981837
WY11-05	246.8	0.00122897	4.70372e-05	0.282412	0.28241	1.82007e-05	0.28241	0.283073	-12.8002	-7.3895	0.644002	1160.38	1742.9	-0.998583
WY11-06	932.701	0.0246446	0.000874515	0.282365	0.282363	2.19115e-05	0.282348	0.282575	-14.4609	5.63161	0.776483	1251.2	1451.47	-0.973659
WY11-07	237.179	0.000930885	2.82469e-05	0.282515	0.282513	2.29348e-05	0.282513	0.28308	-9.16295	-3.95889	0.811494	1019.14	1519.13	-0.999149
WY11-08	249.786	0.000312476	1.17888e-05	0.282438	0.282436	2.28508e-05	0.282436	0.283071	-11.8723	-6.38957	0.808545	1123.49	1682.29	-0.999645
WY11-09	789.93	0.0206391	0.000711756	0.282148	0.282146	2.36448e-05	0.282135	0.282679	-22.14	-5.07905	0.837641	1546.52	2021.13	-0.978562
WY11-10	241.467	0.0174824	0.00060366	0.282142	0.28214	2.64198e-05	0.282137	0.283076	-22.3674	-17.168	0.934812	1551.02	2350.36	-0.981817
WY11-11	665.632	0.029176	0.0010973	0.282186	0.282184	2.01564e-05	0.28217	0.28277	-20.7953	-6.6084	0.713863	1509.22	2020.74	-0.966949
WY11-12	604.002	0.0156688	0.000539287	0.282142	0.28214	1.89527e-05	0.282134	0.282815	-22.347	-9.26084	0.671141	1547.63	2139.54	-0.983756
WY11-13	256.44	0.000854482	2.54084e-05	0.282601	0.282599	1.85235e-05	0.282599	0.283066	-6.11598	-0.485853	0.655438	900.942	1314.36	-0.999235
WY11-14	241.799	0.000385886	1.41794e-05	0.282411	0.282409	1.92195e-05	0.282409	0.283076	-12.8233	-7.51726	0.680044	1160.29	1747.02	-0.999573
WY11-15	244.815	0.000709451	2.77564e-05	0.282478	0.282476	2.0102e-05	0.282476	0.283074	-10.4591	-5.08765	0.711273	1069.3	1596.34	-0.999164
WY11-16	242.608	0.000404375	1.26463e-05	0.28238	0.282378	2.0392e-05	0.282378	0.283076	-13.9243	-8.60078	0.721533	1202.73	1815.76	-0.999619
WY11-17	234.514	0.000829431	3.06973e-05	0.282467	0.282465	1.82366e-05	0.282464	0.283082	-10.8722	-5.72801	0.645253	1085.36	1628.67	-0.999075
WY11-18	850.963	0.0151721	0.000567284	0.282277	0.282275	1.90635e-05	0.282266	0.282635	-17.5747	0.908054	0.675436	1362.82	1689.22	-0.982913
WY11-19	252.369	0.0140523	0.000528705	0.282326	0.282324	1.79799e-05	0.282321	0.283069	-15.8533	-10.4023	0.636196	1294.29	1936.45	-0.984075
WY11-20	236.948	0.0215906	0.000801074	0.282582	0.28258	2.64167e-05	0.282577	0.28308	-6.78606	-1.70708	0.934692	945.897	1376.53	-0.975871
WY11-21	241.236	0.000467274	1.42553e-05	0.282506	0.282504	2.37862e-05	0.282504	0.283077	-9.46485	-4.16945	0.841624	1030.46	1535.6	-0.999571
WY11-22	248.234	0.000471727	1.2272e-05	0.282575	0.282573	2.24467e-05	0.282573	0.283072	-7.04522	-1.59413	0.794243	936.676	1378.19	-0.99963
WY11-23	941.724	0.0178388	0.000598854	0.282201	0.282199	2.08944e-05	0.282188	0.282569	-20.2797	0.170379	0.740454	1469.5	1806.7	-0.981962
WY11-24	908.594	0.0170596	0.000604569	0.282193	0.282191	2.38596e-05	0.282181	0.282593	-20.5352	-0.81607	0.845475	1479.68	1843.59	-0.98179
WY11-25	920.428	0.0372356	0.00127594	0.282191	0.282189	2.57058e-05	0.282167	0.282584	-20.6121	-1.04594	0.910919	1509.12	1867.39	-0.961568
WY11-26	874.75	0.0290367	0.00100257	0.282209	0.282207	2.3573e-05	0.28219	0.282618	-19.986	-1.24004	0.835256	1473.58	1844.17	-0.969802
WY11-27	406.606	0.0238269	0.000907514	0.282217	0.282215	2.27989e-05	0.282208	0.282957	-19.6922	-10.9997	0.806988	1458.34	2094.48	-0.972665
WY11-28	244.695	0.00543999	0.000198975	0.282562	0.28256	2.18703e-05	0.282559	0.283074	-7.50031	-2.15764	0.773841	958.94	1411.11	-0.994007
WY11-29	625.432	0.0251042	0.000838321	0.282186	0.282184	2.1819e-05	0.282174	0.282799	-20.7858	-7.35411	0.772675	1498.59	2036.36	-0.974749
WY11-30	231.717	0.000467817	1.25003e-05	0.282654	0.282652	1.84417e-05	0.282652	0.283084	-4.25922	0.829581	0.652507	828.557	1211.55	-0.999623
